# Supplementary material for: Myocardial 18F-FDG Uptake Pattern for Cardiovascular Risk Stratification in Patients Undergoing Oncologic PET/CT
Source: PubMed Central journal article supplement (PMC7408629; doi:10.3390/jcm9072279), 2020-07-17
Supplement: jcm-09-02279-s001.pdf [file jcm-09-02279-s001.pdf]

Supplementary Materials:

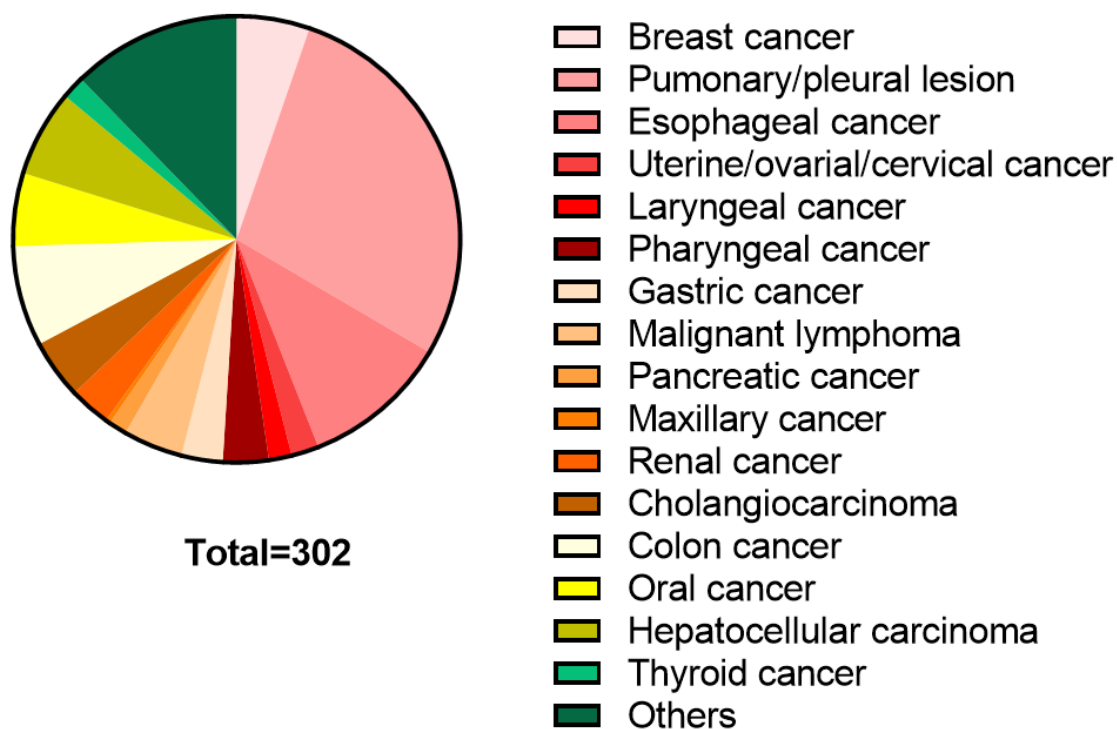

Figure S1. Underlying diseases of patients undergoing  $^{18}\text{F}$ -FDG PET/CT.

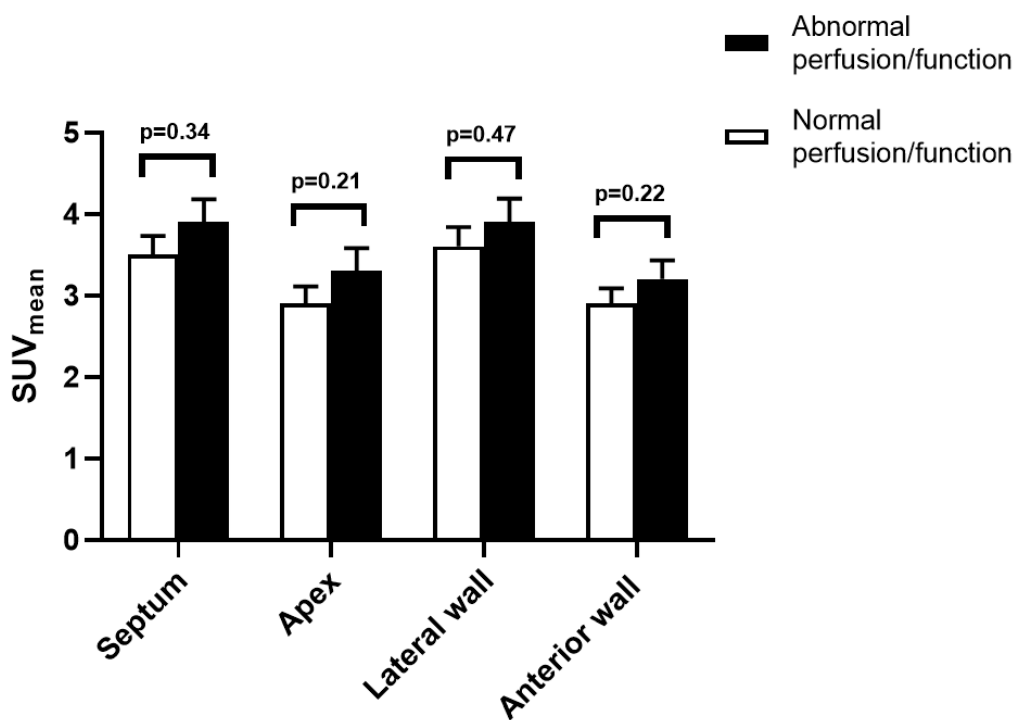

Figure S2. Left ventricular  $^{18}\text{F}$ -FDG PET/CT uptake given as mean standardized uptake values (SUV<sub>mean</sub>) in different regions of the myocardium (stratified by MPI normal/abnormal findings). No differences were observed in SUV<sub>mean</sub> across different regions with respect to perfusion findings.

**Table S1.** Baseline PET/CT and MPI parameters.

| PET/CT and MPI parameters                                   | Total cohort<br>n = 302 | No myocardial <sup>18</sup> F-FDG uptake<br>n = 109 | Diffuse myocardial <sup>18</sup> F-FDG uptake<br>n = 77 | Focal myocardial <sup>18</sup> F-FDG uptake<br>n = 24 | Focal on diffuse myocardial <sup>18</sup> F-FDG uptake<br>n = 92 | p-value |
|-------------------------------------------------------------|-------------------------|-----------------------------------------------------|---------------------------------------------------------|-------------------------------------------------------|------------------------------------------------------------------|---------|
| Reversible perfusion defect, n (%)                          | 37 (12.3)               | 14 (12.8)                                           | 6 (7.8)                                                 | 7 (29.2)                                              | 10 (10.9)                                                        | 0.046   |
| Irreversible perfusion defect, n (%)                        | 60 (19.9)               | 15 (13.8)                                           | 14 (18.2)                                               | 12 (50.0)                                             | 19 (20.7)                                                        | 0.001   |
| LVEF (%), mean                                              | 58.7 ± 13.2             | 61.2 ± 10.3                                         | 57.7 ± 15.5                                             | 51.6 ± 15.9                                           | 58.3 ± 12.9                                                      | 0.012   |
| CACS (Agatston), mean±SD                                    | 769.1 ± 1190            | 830.9 ± 1071.7                                      | 869.3 ± 171                                             | 823.4 ± 923                                           | 602.3 ± 809.8                                                    | 0.61    |
| Rest heart rate prior to MPI, mean±SD                       | 75.5 ± 15.7             | 76.2 ± 15.9                                         | 76.7 ± 14.4                                             | 84.3 ± 22.8                                           | 72.1 ± 14.6                                                      | 0.031   |
| Systolic blood pressure, mean±SD                            | 136.4 ± 22.3            | 140.6 ± 23.0                                        | 136.1 ± 19.5                                            | 133.3 ± 9.1                                           | 133.1 ± 25.1                                                     | 0.73    |
| Diastolic blood pressure, mean±SD                           | 77.3 ± 11.2             | 79.3 ± 9.7                                          | 77.1 ± 11.6                                             | 69.0 ± 16.4                                           | 76.6 ± 11.7                                                      | 0.49    |
| Indication MPI, n (%)                                       |                         |                                                     |                                                         |                                                       |                                                                  |         |
| Evaluation prior to surgery                                 | 186                     | 76 (69.7)                                           | 43 (55.8)                                               | 10 (41.7)                                             | 57 (62.0)                                                        | 0.008   |
| Suspected progression of CAD                                | 60 (19.9)               | 22 (20.2)                                           | 14 (18.2)                                               | 10 (41.7)                                             | 14 (15.2)                                                        |         |
| Suspected new onset CAD                                     | 56 (18.5)               | 11 (10.1)                                           | 20 (26.0)                                               | 4 (16.7)                                              | 21 (22.8)                                                        |         |
| MPI stress test, n (%)                                      |                         |                                                     |                                                         |                                                       |                                                                  |         |
| Adenosine                                                   | 264 (87.7)              | 95 (78.2)                                           | 66 (86.8)                                               | 22 (91.7)                                             | 81 (88.0)                                                        | 0.59    |
| Dobutamine                                                  | 29 (9.6)                | 9 (8.3)                                             | 8 (10.5)                                                | 2 (8.3)                                               | 10 (10.9)                                                        |         |
| Bicycle                                                     | 7 (2.3)                 | 5 (4.6)                                             | 1 (1.3)                                                 | 0 (0)                                                 | 1 (1.1)                                                          |         |
| Injected <sup>18</sup> F-FDG dose (MBq), mean±SD            | 330.4 ± 47.8            | 332.0 ± 48.1                                        | 318.9 ± 53.3                                            | 347.5 ± 23.0                                          | 334.2 ± 45.4                                                     | 0.051   |
| Injected rest <sup>99m</sup> Tc SPECT dose (MBq), mean±SD   | 993.0 ± 148             | 1004.5 ± 131                                        | 966.9 ± 172                                             | 1017.0 ± 137                                          | 993.9 ± 147.4                                                    | 0.34    |
| Injected stress <sup>99m</sup> Tc SPECT dose (MBq), mean±SD | 348.5 ± 62.8            | 347.0 ± 46.5                                        | 338.5 ± 58.7                                            | 367.4 ± 76.0                                          | 353.6 ± 77.1                                                     | 0.19    |

**Table S2.** Predictive value of <sup>18</sup>F-FDG myocardial uptake pattern for abnormal MPI findings.

| Univariate logistic regression analysis for abnormal myocardial perfusion/function on myocardial perfusion imaging-SPECT (total cohort, n = 302) |       |            |         |  |
|--------------------------------------------------------------------------------------------------------------------------------------------------|-------|------------|---------|--|
| Independent variables                                                                                                                            | OR    | 95% CI     | p-value |  |
| Male sex                                                                                                                                         | 2.21  | 1.29–3.97  | 0.004   |  |
| Age                                                                                                                                              | 1.009 | 0.97–1.03  | 0.45    |  |
| BMI                                                                                                                                              | 1.016 | 0.99–1.04  | 0.27    |  |
| Smoking                                                                                                                                          | 1.11  | 0.68–1.82  | 0.68    |  |
| Hypertension                                                                                                                                     | 1.063 | 0.67–1.67  | 0.79    |  |
| Dyslipidemia                                                                                                                                     | 1.14  | 0.67–1.95  | 0.63    |  |
| Diabetes                                                                                                                                         | 1.053 | 0.58–1.90  | 0.86    |  |
| Positive family history                                                                                                                          | 0.997 | 0.43–2.30  | 0.99    |  |
| Glucose level prior to FDG PET                                                                                                                   | 1.17  | 1.04–1.35  | 0.032   |  |
| Resting heart rate                                                                                                                               | 1.00  | 0.99–1.02  | 0.53    |  |
| Injected <sup>18</sup> F-FDG dose (MBq)                                                                                                          | 1.00  | 0.99–1.00  | 0.113   |  |
| No myocardial <sup>18</sup> F-FDG uptake                                                                                                         | 0.52  | 0.32–0.85  | 0.01    |  |
| Diffuse myocardial <sup>18</sup> F-FDG uptake                                                                                                    | 1.01  | 0.59–1.71  | 0.97    |  |
| Focal myocardial <sup>18</sup> F-FDG uptake                                                                                                      | 5.10  | 2.00–13.3  | 0.001   |  |
| Focal on diffuse myocardial <sup>18</sup> F-FDG uptake                                                                                           | 1.15  | 0.70–1.89  | 0.59    |  |
| Focal spot myocardial <sup>18</sup> F-FDG uptake                                                                                                 | 7.12  | 1.99–25.63 | 0.003*  |  |

BMI, body mass index; CI, confidence interval; OR, odds ratio.
